# Supplementary material for: A Natural Dietary Supplement with a Combination of Nutrients Prevents Neurodegeneration Induced by a High Fat Diet in Mice
Source: PubMed Central journal article supplement (PMC6165339; doi:10.3390/nu10091130), 2018-08-21
Supplement: nutrients-10-01130-s001.pdf [file nutrients-10-01130-s001.pdf]

**Supplemental Table 1.** Composition of mineral mix in STD and HFD

| <b>PMIX AIN-93G-MX</b>                 |                      |
|----------------------------------------|----------------------|
| <b>Ingredient (mg/kg)</b>              | <b>4800 g/100 kg</b> |
| Calcium carbonate                      | 6854.40              |
| Potassium phosphate monobasic          | 2700.10              |
| Potassium citrate tribasic monohydrate | 1223.08              |
| Sodium chloride                        | 1395.94              |
| Magnesium oxide                        | 703.34               |
| Potassium sulfate                      | 1004.32              |
| Chromium K sulfate                     | 1.37                 |
| Cupric carbonate                       | 8.26                 |
| Sodium fluoride                        | 1.38                 |
| Potassium iodate                       | 0,28                 |
| Ferric citrate                         | 55.27                |
| Manganese carbonate                    | 14.45                |
| Ammonium molybdate                     | 0.21                 |
| Basic nickel carbonate                 | 0.15                 |
| Lithium chloride                       | 0.14                 |
| Boric acid                             | 0.68                 |
| Ammonium metavanadate                  | 0.14                 |
| Sodium metasilicate                    | 6.88                 |
| Zinc carbonate                         | 45.94                |
| Sodium selenite                        | 0.21                 |

Abbreviations are: STD, standard diet; HFD, High Fat Diet

**Supplemental Table 2.** Composition of vitamin mix in STD and HFD

| <b>PMIX AIN-93G-MX</b>                    |                      |                |
|-------------------------------------------|----------------------|----------------|
| <b>Ingredient</b>                         | <b>2100 g/100 kg</b> |                |
| Vit. K <sub>1</sub> phylloquinone 97-103% | 1.58                 | <b>mg/Kg</b>   |
| Nicotinic acid 99.5-100.5%                | 63.0                 | <b>mg/Kg</b>   |
| Calcium pantothenate 98-101%              | 33.6                 | <b>mg/Kg</b>   |
| Vit. A palmitate 250                      | 8400                 | <b>I.U./Kg</b> |
| Biotin 97.5-100.5%                        | 0.42                 | <b>mg/Kg</b>   |
| Piridoxine 99-101%                        | 14.70                | <b>mg/Kg</b>   |
| Riboflavin 97-103%                        | 12.60                | <b>mg/Kg</b>   |
| Thiamine 98.5-101%                        | 12.60                | <b>mg/Kg</b>   |
| Vit. D3 Cholecalciferol, 500              | 2100                 | <b>I.U./Kg</b> |
| Cyanocobalamin > 0.1%                     | 0.053                | <b>mg/Kg</b>   |
| Folic Acid 96-102%                        | 4.16                 | <b>mg/Kg</b>   |
| $\alpha$ -tocopheryl acetate, 500 IU/g    | 157.50               | <b>mg/Kg</b>   |
